# Supplementary material for: Epidemiological Survey and Genetic Characterization of Type 3 Vaccine-Derived Poliovirus Isolated from a Patient with Four Doses of Inactivated Polio Vaccine in Henan Province, China
Source: Research Square preprint supplement (doi:10.21203/rs.3.rs-1564479/v1), 2022-04-25
Supplement: Supplementary file 1 [file f546494dcad27838be14c01f.docx]

|  | Region | Nucleotide |  |  |  |  | Amino acid |  |  |  |  |
| --- | --- | --- | --- | --- | --- | --- | --- | --- | --- | --- | --- |
|  |  | Position | Sabin | CHN21006-1 | CHN21006-2 | CHN21006-3 | Position | Sabin | CHN21006-1 | CHN21006-2 | CHN21006-3 |
| Sabin 3 | 5‘UTR | 28 | C | T | T | T |  |  |  |  |  |
| 60 | T | C | C | C |  |  |  |  |  |
| 69 | A | G | G | G |  |  |  |  |  |
| 472 | T | C | C | C |  |  |  |  |  |
| 667 | T | C | C | C |  |  |  |  |  |
| 703 | A | A | A | G |  |  |  |  |  |
| VP2 | 1071 | T | T | T | A | 109 | F | F | F | Y |
| 1412 | A | G | G | G | 223 | K | E | E | E |
| 1439 | A | G | G | G | 232 | N | D | D | D |
| 1463 | G | G | G | A | 240 | E | E | E | K |
| 1559 | A | T | T | T | 272 | S | C | C | C |
| 1592 | A | T | T | T | 283 | L | M | M | M |
| 1693 | T | C | C | C |  |  |  |  |  |
| 1726 | C | T | T | T |  |  |  |  |  |
| VP3 | 1780 | C | T | T | T |  |  |  |  |  |
| 1837 | C | C | C | T |  |  |  |  |  |
| 1991 | G | A | A | A | 416 | D | N | N | N |
| 2095 | C | C | C | T |  |  |  |  |  |
| 2153 | C | T | T | T |  |  |  |  |  |
| 2222 | G | G | A | A | 493 | V | V | T | T |
| 2223 | T | T | C | C |
| 2464 | T | C | C | C |  |  |  |  |  |
| VP1 | 2493 | C | T | T | T | 583 | T | I | I | I |
| 2506 | A | G | G | A |  |  |  |  |  |
| 2637 | C | T | T | T | 631 | A | V | V | V |
| 2651 | G | A | A | A | 636 | V | I | I | I |
| 2728 | C | T | T | T |  |  |  |  |  |
| 2767 | C | T | T | T |  |  |  |  |  |
| 2884 | A | G | G | G |  |  |  |  |  |
| 2972 | A | A | A | C | 744 | K | K | K | C |
| 2989 | C | C | C | T |  |  |  |  |  |
| 3106 | C | T | T | T |  |  |  |  |  |
| 3190 | A | G | G | G |  |  |  |  |  |
| 2A | 3727 | T | C | C | C |  |  |  |  |  |
| 2B | 3838 | T | T | T | C |  |  |  |  |  |
| 2C | 4195 | A | A | A | G |  |  |  |  |  |
| 4312 | T | C | C | C |  |  |  |  |  |
| 4363 | G | G | G | A |  |  |  |  |  |
| 4384 | C | T | T | C |  |  |  |  |  |
| 4663 | T | T | T | C |  |  |  |  |  |
| Sabin 2 | 4953 | G | A | A | A | 1403 | R | K | K | K |
| 4975 | T | T | T | C |  |  |  |  |  |
| 5032 | C | T | T | T |  |  |  |  |  |
| 5093 | T | C | C | C |  |  |  |  |  |
| 3A | 5119 | A | A | A | G |  |  |  |  |  |
| 5356 | A | G | G | G |  |  |  |  |  |
| 3C | 5461 | T | T | T | C |  |  |  |  |  |
| 5521 | C | C | C | T |  |  |  |  |  |
| 5530 | G | G | G | A |  |  |  |  |  |
| 5680 | A | A | A | G |  |  |  |  |  |
| 5974 | T | T | T | C |  |  |  |  |  |
| 3D | 6073 | T | C | C | C |  |  |  |  |  |
| 6265 | C | T | T | T |  |  |  |  |  |
| 6437 | C | T | T | T |  |  |  |  |  |
| 6725 | G | A | A | A | 1994 | E | K | K | K |
| 6772 | C | T | T | T |  |  |  |  |  |
| 6898 | A | G | G | G |  |  |  |  |  |
| 6905 | C | T | T | T |  |  |  |  |  |
| 6952 | C | C | C | T |  |  |  |  |  |
| 7060 | T | C | C | C |  |  |  |  |  |
| 7198 | T | T | T | C |  |  |  |  |  |
| 7351 | T | C | C | C |  |  |  |  |  |
